# Supplementary material
Source: PubMed Central journal article supplement (PMC2906548)
Supplement: 0910106107_pnas.200910106SI.pdf [file 0910106107_pnas.200910106SI.pdf]

# Supporting Information

Tsuji et al. 10.1073/pnas.0910106107

## SI Text

**Electrophysiological Analysis of Safe MEF-iPS-Derived Neurons.** We examined the electrophysiological properties of the 38C2 iPS-derived neurons. After 21–28 d of differentiation, 38C2 iPS-PNS- and EB3 ES-PNS-derived neurons were examined electrophysiologically using whole-cell patch clamping. In the current-clamp mode, depolarizing current injections triggered repetitive action potentials in both the 38C2 PNS- ( $n = 11$  of 16) and EB3 ES-PNS- ( $n = 5$  of 7) derived neurons. These action potentials were completely blocked by tetrodotoxin (TTX; 1  $\mu$ M; Fig. S1A), indicating that they were mediated by voltage-gated Na<sup>+</sup> channels. In voltage clamp at  $-60$  mV, when step voltage commands were applied to 38C2 PNS-derived neurons, very rapid inward currents were observed from around  $-40$  mV (Fig. S1 B-1 and B-2). The transient inward currents were immediately followed by transient outward currents (Fig. S1B-1), observed from about  $-20$  mV. These K<sup>+</sup> channel-like transient currents may be responsible for the reduction in the amplitudes of the all-or-none Na<sup>+</sup> currents (Fig. S1C). Steady outward currents, similar to those mediated by delayed-rectifier K<sup>+</sup> channels, were also observed (Fig. S1 B-1 and D). Although we have not yet identified the channels that were responsible for these currents, our findings showed that the 38C2 PNSs produced neuronal cells equipped with functional channels that could generate and modify action potentials.

## SI Materials and Methods

**Cell Culture and Neural Induction.** To culture PNSs, day 6 EBs were dissociated and cultured in suspension at  $5 \times 10^4$  cells/mL in media hormone mix (MHM) supplemented with B27 and 20 ng/mL FGF-2 (Peprotech) for 7–8 d (1, 2). To culture SNSs, PNSs were dissociated and cultured in the same culture medium for 7–8 d. For further differentiation, neurospheres were plated onto poly-L-ornithine/fibronectin-coated coverslips and cultured without FGF-2 for 5 d. To examine the differentiation efficiency, neurospheres dissociated by TripLE Select (Invitrogen) were plated onto poly-L-ornithine/fibronectin-coated coverslips at  $5 \times 10^4$  cells/cm<sup>2</sup>, cultured without FGF-2 for 5 d, and processed for immunocytochemistry as described previously (1, 2).

**Lentivirus Production and Infection of Secondary Neurospheres.** High-titer, concentrated stocks prepared by ultracentrifugation and resuspension in Dulbecco's PBS (2.68 mM KCl, 1.47 mM KH<sub>2</sub>PO<sub>4</sub>, 136.89 mM NaCl, and 8.1 mM Na<sub>2</sub>HPO<sub>4</sub>) were added to the culture medium in which SNSs were formed from EB3 ES, 38C2 PNSs (multiplicity of infection, MOI = 1.0). To prelabel the grafted cells in the case of 335D1 TTF-iPS-SNS, we used lentivirus to transduce mRFP into 335D1 PNSs by modified lentivirus vectors pCSII-EF-mRFP (3).

**Electrophysiology.** For electrophysiological analysis, EB3 ES or 38C2 PNSs were plated on poly-L-ornithine/fibronectin-coated coverslips and allowed to differentiate for 21–28 d. The cells with a neuron-like morphology were identified under an inverted microscope (Diaphot-TMD 200; Nikon), and whole-cell patch clamp recording was performed at room temperature using an Axopatch 200B (Axon Instruments). The cultured cells were continuously perfused with an external solution containing (in mM) 150 NaCl, 2.5 KCl, 2 CaCl<sub>2</sub>, 1 MgCl<sub>2</sub>, 10 D-glucose, and 10 Hepes (pH 7.4 adjusted with NaOH, 310 mOsm). Patch pipettes had a resistance of 10–15 M $\Omega$  when filled with pipette solution composed of (in mM) 130 K-gluconate, 1 CaCl<sub>2</sub>, 1 MgCl<sub>2</sub>, 10 EGTA, 10 sucrose, and 10 Hepes (pH 7.4 adjusted with KOH, 280 mOsm). Capacitance and series resistance were com-

pensated, and the liquid junction potential was corrected. Cultured cells were held at  $-60$  mV, and voltage steps were applied (10 mV, 150 ms) from  $-90$  mV to 40 mV to elicit voltage-activated currents. The peak amplitudes of the inward currents and the steady-state current amplitudes were plotted against the step-voltage commands. Action potentials were evoked by injecting step currents (25 pA, 150 ms) in the current-clamp mode. TTX (Sankyo Co. Ltd.) was added to the external solution to block action potentials. Signals were filtered at 5 kHz and digitized at 20 kHz (Digidata 1200; Axon Instruments).

**Transplantation into Intact and Injured Spinal Cord.** The transplantation of lentivirally transduced iPS- and ES-SNSs was performed using a glass micropipette configured to a stereotaxic injector (KDS 310; Muromachi Kikai). Transplantation into the intact spinal cord of C57BL6 female mice was conducted after laminectomy without the induction of spinal cord injury (Fig. S3; 38C2 SNS,  $n = 2$ ; EB3 SNS,  $n = 2$ ). For transplantation into the injured spinal cord, the injured site was again exposed 9 d after the injury, and  $5 \times 10^5$  cells of 38C2 PNSs/SNSs; 335D1, 256H13, or 256H18 iPS-SNSs; EB3 or 1A2 ES-SNSs; or adult dermal fibroblasts in 2  $\mu$ L of cell suspension were transplanted into the lesion epicenter at a rate of 0.5  $\mu$ L/min. In the vehicle-control group, PBS was injected instead of SNSs into the lesion site 9 d after the injury.

**Bioluminescent Imaging.** A Xenogen-IVIS 100 cooled CCD optical macroscopic imaging system (SC BioScience) was used for BLI, as reported previously (4). To quantify the photon counts, we defined a ROI over the cell-implanted area and examined the same ROI in all of the animals. The obtained photon count intensity was expressed as a percentage of the initial value.

**Histological Analyses.** Grafted animals were deeply anesthetized and intracardially perfused with 4% paraformaldehyde (pH 7.4). The dissected spinal cords were postfixed for 3 h in 4% PFA, soaked overnight in 10% followed by 30% sucrose, embedded in optimal cutting temperature (OCT) compound, and sectioned into 20- $\mu$ m axial/sagittal sections using a cryostat. Hematoxylin and eosin (H&E) staining was carried out for general histological examination. To examine the distribution of 38C2 SNSs grafted into intact or injured spinal cords, the sections were immunostained with an anti-RFP antibody and visualized with diaminobenzidine (DAB) solution. The phenotypes of the grafted cells were assessed by fluorescent double-immunostaining with antibodies against RFP and one of the cell-type-specific markers listed in Table S2. Images were obtained by fluorescence microscopy (Axioskop 2 plus; Carl Zeiss, and BZ-9000; KEYENCE Co.) or confocal microscopy (LSM510; Carl Zeiss). To quantify the proportion of each phenotype in vivo, we selected five representative midsagittal sections and captured five regions within 500  $\mu$ m rostral and caudal to the lesion epicenter randomly at 200 $\times$  magnification. RFP-positive engrafted cells as well as each phenotypic marker-positive cells were counted in each section. To quantify the 5HT<sup>+</sup> fibers after 38C2 SNS transplantation, we selected five representative axial sections from each animal (38C2 SNS group,  $n = 3$ ; PBS control group,  $n = 3$ ), randomly captured 10 regions in each axial section 4 mm caudal to the epicenter at 200 $\times$  magnification, and quantified the total 5HT<sup>+</sup> area using the MCID system equipped with a CCD camera (DXC-390; Sony).

**Transplantation into the Brain of NOD/SCID Mice.** The transplantation of neurospheres lentivirally transduced with Venus (pCSII-EF-MCS-IRES2-Venus) (3) was performed using a glass micropipette

fitted to a stereotaxic injector as described previously (5). The tip of the micropipette was inserted into the right striatum (2 mm lateral, 1 mm rostral to bregma; depth, 3 mm from dura) of female NOD/SCID mice, and 3  $\mu$ L of 38C2 SNS cell suspension ( $2 \times 10^5$  cells) was injected. Twenty-four weeks after transplantation, the treated mice were cardially perfused, processed for immunohistochemical analysis, and analyzed by confocal laser scanning microscopy (LSM 510

META; Carl Zeiss). To distinguish Venus from EGFP, the LSM 510 META system was used.

**Preparation of Mouse Whole-Dermal Fibroblasts.** The whole dermis was collected from adult female C57BL/6J mice and cultured in MF-start medium (Toyobo). After lentiviral transduction with Venus (3), these cells were used for transplantation.

- Okada Y, et al. (2008) Spatiotemporal recapitulation of central nervous system development by murine embryonic stem cell-derived neural stem/progenitor cells. *Stem Cells* 26: 3086–3098.
- Okada Y, Shimazaki T, Sobue G, Okano H (2004) Retinoic-acid-concentration-dependent acquisition of neural cell identity during in vitro differentiation of mouse embryonic stem cells. *Dev Biol* 275:124–142.
- Miyoshi H, Blömer U, Takahashi M, Gage FH, Verma IM (1998) Development of a self-inactivating lentivirus vector. *J Virol* 72:8150–8157.
- Okada S, et al. (2005) In vivo imaging of engrafted neural stem cells: Its application in evaluating the optimal timing of transplantation for spinal cord injury. *FASEB J* 19: 1839–1841.
- Ogawa D, et al. (2009) Evaluation of human fetal neural stem/progenitor cells as a source for cell replacement therapy for neurological disorders: Properties and tumorigenicity after long-term in vitro maintenance. *J Neurosci Res* 87:307–317.

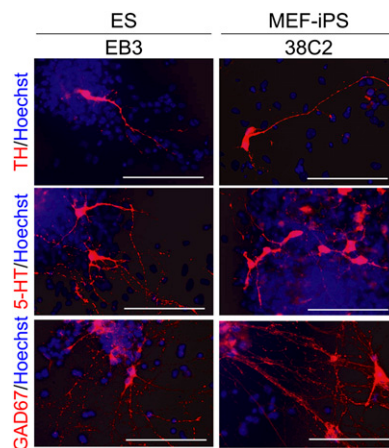

**Fig. S1.** Neural differentiation of pre-evaluated safe MEF-iPS cells in vitro. Immunocytochemical analyses of tyrosine hydroxylase (TH), 5-hydroxytryptamine (5HT), and glutamic acid decarboxylase 67 (GAD67) proteins in the differentiated PNSs derived from EB3 ES and 38C2 iPS cells. (Scale bar: 100  $\mu$ m.)









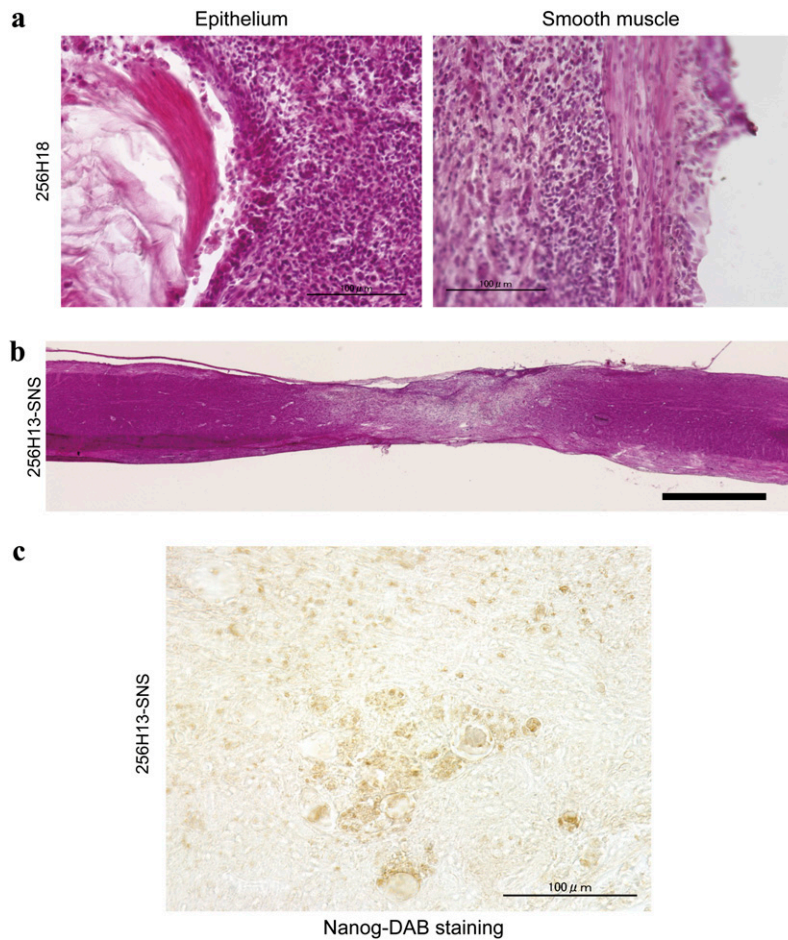

**Fig. S9.** (A) Teratoma formation in injured spinal cords after unsafe 256H18 SNSs transplantation. Higher-magnification views of Fig. 5E. Stratified squamous epithelia with keratinization (*Left*) and smooth muscle tissues around the dilated cyst (*Right*) were observed. (B and C) Scattered small cell clusters of Nanog<sup>+</sup> undifferentiated cells in injured spinal cords after unsafe 256H13 SNSs transplantation. Only one mouse in the 256H13 group showed teratoma formation at 6 wk after injury through H&E staining. No tumor formation was observed in the other mice in 256H13 group (B). However, scattered small clusters of Nanog<sup>+</sup> undifferentiated cells were observed in these mice without obvious teratoma formation (C). (Scale bar: A and C, 100  $\mu$ m; B, 1 mm.)

**Table S1. RT-PCR primers in this study**

| Gene                | Sense                         | Antisense                      |
|---------------------|-------------------------------|--------------------------------|
| <i>Nanog</i>        | AGGGTCTGCTACTGAGATGCTCTG      | CAACCACTGGTTTTCTGCCACCG        |
| <i>ERas</i>         | ACTGCCCCATCAGACTGCTACT        | CACTGCCTTGTACTCGGGTAGCTG       |
| <i>Oct3/4</i>       | CTGAGGGCCAGGCAGGAGCACGAG      | CTGTAGGGAGGGCTTCGGGCACCTT      |
| <i>Sox2</i>         | GGTTACTCTCTCCCACTCCAG         | TCACATGTGCGACAGGGGACAG         |
| <i>c-Myc</i>        | CAGAGGAGGAACGAGCTGAAGCGC      | TTATGCACCAGAGTTTCTGAAGCTGTTCCG |
| <i>Klf4</i>         | CACCATGGACCGGGCGTGGCTGCCAGAAA | TTAGGCTGTTCTTTCCGGGGCCACGA     |
| <i>Sox1</i>         | ATGTACAGCATGATGATGGAGACC      | AGCGAGTACTTGTCTTCTTGAGC        |
| <i>Tuj1</i>         | AGACCTGCAGCTGGAGCGCATCAG      | CAGCTCCGCGCCCTCCGTATAGTG       |
| <i>GFAP</i>         | GCCCAACAGCAGTCCACGTGGAG       | AGCTTCGTGCTTGGCTTGGCGGAG       |
| <i>Gata6</i>        | GCAATGCATGCGGTCTTACAGC        | TCAGGCCAGGGCCAGAGCACCAAGAATC   |
| <i>Brachury (T)</i> | ATGCCAAAGAAAGAAACGAC          | AGAGGCTGTAGAACATGATT           |
| <i>EGFP</i>         | CGACTTCTTCAAGTCCGCCATGCCCG    | CCAGCAGGACCATGTGATCGCGCTTC     |
| <i>b-actin</i>      | CGTGGGCCGCCCTAGGCACCA         | TTGGCCTTAGGGTTCAAGGGGG         |

**Table S2. Antibodies used in this study**

| Antibody type                                          | Condition            |
|--------------------------------------------------------|----------------------|
| For immunocytochemistry                                |                      |
| Tuj1 (Sigma)                                           | Mouse IgG, 1:1,000   |
| GFAP (DAKO)                                            | Rabbit IgG, 1:4,000  |
| O4 (Chemicon)                                          | Mouse IgM, 1:5,000   |
| CNPase (Sigma)                                         | Mouse IgG, 1:400     |
| 5-HT (Sigma)                                           | Rabbit IgG, 1:20,000 |
| TH (Chemicon)                                          | Rabbit IgG, 1:100    |
| GAD67 (Chemicon)                                       | Mouse IgG, 1:2,500   |
| For immunohistochemistry of NOD/SCID mice analyses     |                      |
| NeuN (Chemicon)                                        | Mouse IgG, 1:500     |
| GFAP (DAKO)                                            | Rabbit IgG, 1:400    |
| APC (Oncogene)                                         | Mouse IgG, 1:100     |
| GFP (MBL)                                              | Rabbit IgG, 1:500    |
| For immunohistochemistry of intact/injured spinal cord |                      |
| Hu*                                                    | Human serum, 1:1,000 |
| GFAP (Zymed)                                           | Rat IgG, 1:200       |
| $\pi$ -GST (BD Biosciences)                            | Mouse IgG, 1:500     |
| 5-HT (Immunostar)                                      | Goat IgG, 1:200      |
| NF200 (Chemicon)                                       | Mouse IgG, 1:500     |
| MBP (Aves Labs)                                        | Chick IgY, 1:200     |
| RFP (MBL)                                              | Rabbit, 1:200        |
| Nanog (ReproCELL)                                      | Rabbit, 1:200        |

\*A gift from Dr. Robert Darnell, Rockefeller University.
